# Supplementary material for: Do Employees Work Less for Female Leaders? A Multi-Method Study of Entrepreneurial Firms
Source: Atypon-hosted journal article supplement (doi:10.1287/orsc.2022.1611), 2022-07-11
Supplement: orsc.2022.1611.sm1.pdf [file orsc.2022.1611.sm1.pdf]

## Appendix A

**Table 1A.** Number of firms by firm age and size (Study 1, Observational Data)

| Firm size | Firm age |        |        |        |        |
|-----------|----------|--------|--------|--------|--------|
|           | 1        | 2      | 3      | 4      | 5      |
| 1-5       | 21,502   | 20,466 | 20,205 | 18,555 | 15,220 |
| 6-10      | 6,913    | 7,246  | 7,162  | 6,750  | 5,827  |
| 11-25     | 3,083    | 3,512  | 3,571  | 3,385  | 2,962  |
| 26-50     | 612      | 737    | 783    | 768    | 653    |
| 51-100    | 155      | 225    | 210    | 208    | 197    |
| 101-250   | 53       | 63     | 73     | 73     | 62     |
| 251-500   | 8        | 12     | 9      | 9      | 10     |
| Total     | 32,326   | 32,261 | 32,013 | 29,748 | 24,931 |

**Table 2A.** Descriptive statistics: Employees in female-led start-up firms (Study 1, Observational Data)

|                                              | All employees - female-led firms |        |       |        | Full-time employees - female-led firms |        |       |        |
|----------------------------------------------|----------------------------------|--------|-------|--------|----------------------------------------|--------|-------|--------|
|                                              | Mean                             | SD     | Min   | Max    | Mean                                   | SD     | Min   | Max    |
| Number of monthly hours worked               | 160.019                          | 29.131 | 0     | 208    | 169.59                                 | 11.666 | 0     | 208    |
| Number of supplementary hours worked (month) | 0.752                            | 5.008  | 0     | 173    | 0.787                                  | 5.215  | 0     | 173    |
| Normal work period (week)                    | 39.141                           | 4.092  | 0     | 48     | 39.653                                 | 2.463  | 0     | 48     |
| Female founders                              | 1                                | 0      | 1     | 1      | 1                                      | 0      | 1     | 1      |
| Mixed gender founders                        | 0                                | 0      | 0     | 0      | 0                                      | 0      | 0     | 0      |
| Female employee                              | 0.513                            | 0.5    | 0     | 1      | 0.52                                   | 0.5    | 0     | 1      |
| Age                                          | 34.886                           | 10.04  | 18    | 60     | 34.915                                 | 10     | 18    | 60     |
| Born in Portugal                             | 0.948                            | 0.223  | 0     | 1      | 0.952                                  | 0.214  | 0     | 1      |
| Below high school education                  | 0.729                            | 0.445  | 0     | 1      | 0.714                                  | 0.445  | 0     | 1      |
| High school completed                        | 0.184                            | 0.388  | 0     | 1      | 0.199                                  | 0.399  | 0     | 1      |
| University Education                         | 0.077                            | 0.267  | 0     | 1      | 0.078                                  | 0.268  | 0     | 1      |
| Education unknown                            | 0.01                             | 0.098  | 0     | 1      | 0.009                                  | 0.094  | 0     | 1      |
| Years in wage employment                     | 10.811                           | 6.335  | 0     | 23     | 10.849                                 | 6.328  | 0     | 23     |
| Years as employer/entrepreneur               | 1.621                            | 3.218  | 0     | 22     | 1.641                                  | 3.228  | 0     | 22     |
| Monthly wage (log)                           | 6.316                            | 0.487  | 4.559 | 8.412  | 6.399                                  | 0.431  | 4.657 | 8.412  |
| Mean age of the founder                      | 36.506                           | 8.781  | 18    | 60     | 36.707                                 | 8.788  | 18    | 60     |
| Founder has below high school                | 0.551                            | 0.495  | 0     | 1      | 0.54                                   | 0.495  | 0     | 1      |
| Founder has high school completed            | 0.239                            | 0.423  | 0     | 1      | 0.243                                  | 0.424  | 0     | 1      |
| Founder has university education             | 0.193                            | 0.392  | 0     | 1      | 0.201                                  | 0.398  | 0     | 1      |
| Founder has education unknown                | 0.017                            | 0.128  | 0     | 1      | 0.016                                  | 0.125  | 0     | 1      |
| Founder's years in wage employment           | 11.58                            | 5.754  | 0     | 22.8   | 11.598                                 | 5.79   | 0     | 22.8   |
| Founder's years as employer/entrepreneur     | 4.474                            | 3.437  | 0     | 21.667 | 4.489                                  | 3.463  | 0     | 21.667 |
| Share of native-born founders                | 0.976                            | 0.154  | 0     | 1      | 0.977                                  | 0.15   | 0     | 1      |
| Firm age                                     | 3.221                            | 1.224  | 1     | 5      | 3.23                                   | 1.222  | 1     | 5      |
| Firm size (log number of employees)          | 2.425                            | 1.08   | 0.693 | 5.861  | 2.323                                  | 1.019  | 0.693 | 5.861  |
| Firm sales (log)                             | 12.43                            | 1.565  | 7.636 | 18.968 | 12.417                                 | 1.557  | 7.636 | 18.968 |
| Part-time employees                          | 0.199                            | 0.399  | 1     | 0      | 0                                      | 0      | 0     | 0      |
| Observations (employee-firm-year)            | 155,024                          |        |       |        | 124,142                                |        |       |        |

**Table 3A. Correlation matrix (Study 1, Observational Data)**

|                                             | 1     | 2     | 3     | 4     | 5     | 6     | 7     | 8     | 9     | 10    | 11    | 12    | 13    | 14    | 15    | 16    | 17    | 18    | 19   | 20   | 21    | 22   | 23   | 24   |  |
|---------------------------------------------|-------|-------|-------|-------|-------|-------|-------|-------|-------|-------|-------|-------|-------|-------|-------|-------|-------|-------|------|------|-------|------|------|------|--|
| 1 Number of monthly hours worked            | 1.00  |       |       |       |       |       |       |       |       |       |       |       |       |       |       |       |       |       |      |      |       |      |      |      |  |
| 2 Number of supplementary hours worked      | 0.02  | 1.00  |       |       |       |       |       |       |       |       |       |       |       |       |       |       |       |       |      |      |       |      |      |      |  |
| 3 Normal work period (week)                 | 0.38  | -0.01 | 1.00  |       |       |       |       |       |       |       |       |       |       |       |       |       |       |       |      |      |       |      |      |      |  |
| 4 Female founders                           | -0.02 | 0.01  | -0.01 | 1.00  |       |       |       |       |       |       |       |       |       |       |       |       |       |       |      |      |       |      |      |      |  |
| 5 Mixed gender founders                     | 0.01  | -0.01 | 0.01  | -0.22 | 1.00  |       |       |       |       |       |       |       |       |       |       |       |       |       |      |      |       |      |      |      |  |
| 6 Female employee                           | -0.02 | -0.01 | -0.01 | 0.13  | 0.01  | 1.00  |       |       |       |       |       |       |       |       |       |       |       |       |      |      |       |      |      |      |  |
| 7 Age                                       | -0.00 | 0.01  | 0.00  | -0.01 | -0.01 | -0.06 | 1.00  |       |       |       |       |       |       |       |       |       |       |       |      |      |       |      |      |      |  |
| 8 Born in Portugal                          | 0.00  | 0.01  | -0.00 | -0.00 | 0.01  | 0.02  | 0.07  | 1.00  |       |       |       |       |       |       |       |       |       |       |      |      |       |      |      |      |  |
| 9 High school completed                     | -0.01 | 0.00  | -0.02 | 0.02  | -0.02 | 0.06  | -0.17 | -0.00 | 1.00  |       |       |       |       |       |       |       |       |       |      |      |       |      |      |      |  |
| 10 University Education                     | -0.07 | -0.01 | -0.06 | 0.01  | -0.01 | 0.05  | -0.09 | 0.04  | -0.14 | 1.00  |       |       |       |       |       |       |       |       |      |      |       |      |      |      |  |
| 11 Education unknown                        | 0.01  | 0.00  | 0.00  | -0.00 | 0.00  | -0.01 | -0.03 | -0.26 | -0.05 | -0.03 | 1.00  |       |       |       |       |       |       |       |      |      |       |      |      |      |  |
| 12 Years in wage employment                 | 0.02  | 0.02  | 0.02  | 0.00  | -0.01 | -0.07 | 0.64  | 0.20  | -0.14 | -0.15 | -0.07 | 1.00  |       |       |       |       |       |       |      |      |       |      |      |      |  |
| 13 Years as employer/entrepreneur           | 0.00  | -0.00 | -0.01 | -0.00 | -0.00 | -0.10 | 0.25  | 0.07  | -0.03 | -0.03 | -0.02 | 0.36  | 1.00  |       |       |       |       |       |      |      |       |      |      |      |  |
| 14 Monthly wage                             | 0.14  | 0.05  | 0.05  | -0.03 | -0.02 | -0.10 | 0.12  | 0.03  | 0.09  | 0.33  | -0.02 | 0.14  | 0.09  | 1.00  |       |       |       |       |      |      |       |      |      |      |  |
| 15 Mean age of the founder                  | -0.01 | 0.01  | 0.00  | -0.11 | -0.01 | -0.00 | 0.14  | 0.03  | -0.02 | -0.02 | -0.01 | 0.09  | 0.03  | 0.05  | 1.00  |       |       |       |      |      |       |      |      |      |  |
| 16 Founder has high school completed        | 0.00  | 0.00  | -0.01 | 0.03  | -0.02 | 0.02  | -0.01 | -0.01 | 0.20  | -0.02 | -0.01 | -0.00 | 0.00  | 0.06  | -0.14 | 1.00  |       |       |      |      |       |      |      |      |  |
| 17 Founder has university education         | -0.03 | 0.05  | -0.03 | 0.04  | -0.03 | 0.05  | 0.02  | 0.01  | 0.12  | 0.35  | -0.02 | -0.04 | -0.02 | 0.29  | -0.03 | -0.23 | 1.00  |       |      |      |       |      |      |      |  |
| 18 Founder has education unknown            | 0.01  | 0.01  | 0.00  | -0.01 | 0.00  | -0.01 | -0.01 | -0.05 | -0.02 | -0.02 | 0.18  | -0.02 | -0.01 | -0.04 | 0.01  | -0.08 | -0.07 | 1.00  |      |      |       |      |      |      |  |
| 19 Founder's years in wage employment       | 0.00  | 0.01  | 0.01  | -0.03 | -0.02 | -0.01 | 0.04  | 0.04  | -0.01 | -0.02 | -0.01 | 0.17  | 0.08  | 0.07  | 0.23  | -0.01 | -0.08 | -0.20 | 1.00 |      |       |      |      |      |  |
| 20 Founder's years as employer/entrepreneur | 0.02  | 0.01  | 0.02  | -0.10 | 0.00  | -0.01 | 0.03  | 0.03  | -0.02 | -0.02 | -0.01 | 0.09  | 0.08  | 0.03  | 0.30  | -0.04 | -0.03 | -0.00 | 0.33 | 1.00 |       |      |      |      |  |
| 21 Share of native-born founders            | 0.00  | -0.00 | 0.00  | -0.02 | 0.02  | -0.00 | 0.02  | 0.28  | -0.01 | 0.00  | -0.08 | 0.06  | 0.02  | -0.02 | 0.04  | -0.01 | 0.01  | -0.15 | 0.09 | 0.05 | 1.00  |      |      |      |  |
| 22 Firm age                                 | -0.00 | 0.01  | 0.02  | -0.01 | 0.00  | -0.00 | 0.04  | 0.01  | 0.02  | 0.04  | -0.03 | 0.09  | 0.04  | 0.16  | -0.03 | -0.01 | 0.02  | 0.01  | 0.01 | 0.04 | 0.01  | 1.00 |      |      |  |
| 23 Firm size                                | -0.00 | 0.07  | 0.01  | -0.03 | 0.03  | -0.02 | 0.05  | -0.02 | -0.09 | 0.03  | -0.01 | 0.11  | -0.01 | 0.25  | 0.05  | -0.01 | 0.11  | -0.02 | 0.07 | 0.08 | -0.00 | 0.06 | 1.00 |      |  |
| 24 Firm sales                               | 0.01  | 0.09  | 0.01  | -0.06 | 0.02  | -0.03 | 0.04  | 0.01  | 0.06  | 0.11  | -0.03 | 0.10  | 0.02  | 0.41  | 0.12  | 0.05  | 0.22  | -0.03 | 0.09 | 0.12 | 0.00  | 0.26 | 0.63 | 1.00 |  |

N = 461,973

**Table 4A.** The effect of founder gender on employees' extra hours worked: Zero-Inflated Negative Binomial model (Study 1, Observational Data)

|                                                                                           | Second stage: number of<br>extra hours                |
|-------------------------------------------------------------------------------------------|-------------------------------------------------------|
| <b><u>Founder Characteristics</u></b>                                                     |                                                       |
| <b>Female founders</b>                                                                    | <b>-0.061 +<br/>(0.037)</b>                           |
| Mixed gender founders                                                                     | -0.096<br>(0.065)                                     |
| Mean age of the founder                                                                   | -0.000<br>(0.002)                                     |
| % Founders with high school completed                                                     | -0.099 *<br>(0.046)                                   |
| % Founders with university education                                                      | 0.009<br>(0.052)                                      |
| % Founder with unknown education                                                          | 0.088<br>(0.067)                                      |
| Founder's years in wage employment (mean)                                                 | -0.000<br>(0.003)                                     |
| Founder's years as employer/entrepreneur (mean)                                           | -0.002<br>(0.004)                                     |
| % Native born founders                                                                    | 0.033<br>(0.110)                                      |
| <b><u>Employee Characteristics</u></b>                                                    |                                                       |
| Female employee                                                                           | -0.051 **<br>(0.018)                                  |
| Age                                                                                       | 0.004 ***<br>(0.001)                                  |
| High school completed                                                                     | -0.009<br>(0.028)                                     |
| University Education                                                                      | -0.190 ***<br>(0.054)                                 |
| Education unknown                                                                         | 0.155<br>(0.084)                                      |
| Years in wage employment                                                                  | 0.003 +<br>(0.002)                                    |
| Monthly wage (log)                                                                        | 0.052<br>(0.075)                                      |
| <b><u>Firm Characteristics</u></b>                                                        |                                                       |
| Firm age                                                                                  | 0.018<br>(0.014)                                      |
| Firm size (log no. Employees)                                                             | -0.102 ***<br>(0.017)                                 |
|                                                                                           | First stage: probability<br>(not working extra hours) |
| Born in Portugal                                                                          | 0.173 +<br>(0.099)                                    |
| Years as entrepreneur                                                                     | 0.088 *<br>(0.036)                                    |
| Firm sales (log)                                                                          | -0.380 ***<br>(0.035)                                 |
| Years as entrepreneur*Firm sales                                                          | -0.006 *<br>(0.003)                                   |
| Year FE, 2-digit Industry FE, County FE and Employee Qualification (1digit occupation) FE | Yes                                                   |
| Observations                                                                              | 461,973                                               |
| Log pseudo likelihood                                                                     | -136,850                                              |

+ p < 0.10; \* p < 0.5; \*\* p < 0.01; \*\*\* p < 0.001. Values in parentheses are standard errors clustered at the firm-level.

**Table 5A.** The effect of founder gender on employees' hours worked: robustness checks with alternative estimation methods (Study 1, Observational Data)

|                                      | Linear models with clustered standard errors |                                 |                                 | Individual Fixed effects models with two-way clustering (worker and firm) |                                 |                                 |
|--------------------------------------|----------------------------------------------|---------------------------------|---------------------------------|---------------------------------------------------------------------------|---------------------------------|---------------------------------|
|                                      | Number of regular hours per month            | Number of extra hours per month | Regular period of work per week | Number of regular hours per month                                         | Number of extra hours per month | Regular period of work per week |
|                                      | (1)                                          | (2)                             | (3)                             | (4)                                                                       | (5)                             | (6)                             |
| <b>Founder Characteristics</b>       |                                              |                                 |                                 |                                                                           |                                 |                                 |
| Female founders                      | -0.349 **<br>(0.135)                         | -1.247<br>(0.873)               | -0.071 *<br>(0.028)             | -0.398 ***<br>(0.093)                                                     | -0.070<br>(1.780)               | -0.049 *<br>(0.019)             |
| Controls                             | Yes                                          | Yes                             | Yes                             | Yes                                                                       | Yes                             | Yes                             |
| Year FE                              | Yes                                          | Yes                             | Yes                             | Yes                                                                       | Yes                             | Yes                             |
| Industry (2d) FE                     | Yes                                          | Yes                             | Yes                             | Yes                                                                       | Yes                             | Yes                             |
| County FE                            | Yes                                          | Yes                             | Yes                             | Yes                                                                       | Yes                             | Yes                             |
| Qualification FE (1digit-occupation) | Yes                                          | Yes                             | Yes                             | Yes                                                                       | Yes                             | Yes                             |
| Observations                         | 461,973                                      | 17,485                          | 461,973                         | 461,973                                                                   | 17,485                          | 461,973                         |
| Adjusted R2                          | 0.089                                        | 0.156                           | 0.107                           | 0.091                                                                     | 0.074                           | 0.075                           |

+ p < 0.10; \* p < 0.05; \*\* p < 0.01; \*\*\* p < 0.001. Models 1 to 3 are three-level mixed-effects count models with random intercepts at both the firm and the worker-within-firm levels. These are non-linear models and due to computational constraints, models 1 and 3 are restricted to a random sample obtained from the original sample used in Table 2. Models 4 to 6 are OLS models with clustered standard errors at the firm-level. Models 7 and 9 are OLS models with individual fixed effects and two-way clustering of the standard errors (at the individual and firm levels). All models are restricted to full-time employees. Models 2, 5 and 8 are restricted to workers with a positive number of extra hours.

**Table 6A.** The effect of founder gender on employees' hours worked: estimations including part-time workers (Study 1, Observational Data)

|                                                                                            | Multi-level/hierarchical linear models   |                                        |                                        | Count Models                             |                                        |                                        |
|--------------------------------------------------------------------------------------------|------------------------------------------|----------------------------------------|----------------------------------------|------------------------------------------|----------------------------------------|----------------------------------------|
|                                                                                            | Number of regular hours per month<br>(1) | Number of extra hours per month<br>(2) | Regular period of work per week<br>(3) | Number of regular hours per month<br>(4) | Number of extra hours per month<br>(5) | Regular period of work per week<br>(6) |
| <b>Founder Characteristics</b>                                                             |                                          |                                        |                                        |                                          |                                        |                                        |
| Female founders                                                                            | 0.001<br>(0.079)                         | -1.499 ***<br>(0.310)                  | -0.036 *<br>(0.016)                    | -0.000<br>(0.002)                        | -0.059 +<br>(0.035)                    | -0.001<br>(0.001)                      |
| Part-time contract                                                                         | -35.170 ***<br>(0.069)                   | -2.596 ***<br>(0.276)                  | -0.527 ***<br>(0.009)                  | -0.271 ***<br>(0.003)                    | -0.180 ***<br>(0.032)                  | -0.040 ***<br>(0.002)                  |
| Same controls and in Table 2                                                               | Yes                                      | Yes                                    | Yes                                    | Yes                                      | Yes                                    | Yes                                    |
| Year FE, 2-digit Industry FE, County FE and Employee Qualification (1 digit occupation) FE | Yes                                      | Yes                                    | Yes                                    | Yes                                      | Yes                                    | Yes                                    |
| Observations                                                                               | 582,417                                  | 22,661                                 | 582,417                                | 582,417                                  | 22,661                                 | 582,417                                |

+ p < 0.10; \* p < 0.05; \*\* p < 0.01; \*\*\* p < 0.001.

**Table 7A.** The effect of founder gender on employees' hours worked: Propensity Score Matching (PSM) estimates (Study 1, Observational Data)

|                 | Number of regular hours per month<br>(1) | Number of extra hours per month<br>(2) | Regular period of work per week<br>(3) |
|-----------------|------------------------------------------|----------------------------------------|----------------------------------------|
| Female founders | -0.358***<br>(0.054)                     | -1.628**<br>(0.744)                    | -0.063***<br>(0.023)                   |
| Observations    | 461,973                                  | 17,485                                 | 461,973                                |

+ p < 0.10; \* p < 0.05; \*\* p < 0.01; \*\*\* p < 0.001. The variables used in the estimation of the propensity score are listed in Table 7A, together with year, industry (2d), county and employee qualification dummies. The algorithm we use identifies each employee's "nearest neighbor" with replacement, thus reducing estimation bias at the cost of higher variance.

**Table 8A.** Covariate balance summary after PSM (Study 1, Observational Data)

|                                              | <b>Standardized differences</b> |                | <b>Variance Ratio</b> |                |
|----------------------------------------------|---------------------------------|----------------|-----------------------|----------------|
|                                              | <b>Raw</b>                      | <b>Matched</b> | <b>Raw</b>            | <b>Matched</b> |
| Female employee                              | 0.300                           | 0.028          | 1.064                 | 0.998          |
| Employee age                                 | -0.016                          | 0.007          | 0.979                 | 1.016          |
| Employee is Portuguese                       | -0.007                          | 0.005          | 1.031                 | 0.978          |
| Employee has secondary education             | 0.041                           | -0.007         | 1.067                 | 0.990          |
| Employee has university degree               | 0.026                           | 0.003          | 1.086                 | 1.008          |
| Employee education is unknown                | 0.002                           | -0.005         | 1.018                 | 0.953          |
| Years of employment experience               | 0.006                           | 0.006          | 1.018                 | 1.013          |
| Years of entrepreneurial experience          | -0.011                          | 0.002          | 0.982                 | 1.005          |
| Monthly wage (log)                           | -0.076                          | -0.013         | 0.948                 | 1.052          |
| Number of founders                           | -0.564                          | 0.037          | 0.189                 | 1.154          |
| Founder Age                                  | -0.249                          | 0.003          | 0.958                 | 0.940          |
| Share of Founders with secondary education   | 0.075                           | -0.008         | 1.199                 | 0.989          |
| Share of founders with university education  | 0.078                           | 0.008          | 1.203                 | 1.010          |
| share of founders with unknown education     | -0.030                          | 0.002          | 0.823                 | 1.018          |
| Founders' employment experience (years)      | -0.073                          | -0.004         | 0.994                 | 0.956          |
| Founders' entrepreneurial experience (years) | -0.238                          | 0.007          | 0.823                 | 1.048          |
| Share of Portuguese founders                 | -0.032                          | 0.006          | 1.312                 | 0.967          |
| Firm age (years)                             | -0.026                          | -0.010         | 0.987                 | 0.994          |
| Firm size (log)                              | -0.072                          | 0.017          | 1.060                 | 1.143          |
| Firm sales (log)                             | -0.141                          | -0.008         | 0.959                 | 1.084          |

Besides the covariates listed above, the estimation of the propensity score further included dummies for employee's qualification level, firm's industry and municipality, and year dummies. The balance for these variables was in general satisfactory and detailed statistics are available upon request.

**Table 9A.** Founding team gender and employee labor: subsample of employees in firms with below-average employment size and above-average sales volume (Study 1, Observational Data)

|                                        | Count Models                      |                                 |                                 | Linear Models (OLS)               |                                 |                                 |
|----------------------------------------|-----------------------------------|---------------------------------|---------------------------------|-----------------------------------|---------------------------------|---------------------------------|
|                                        | Number of regular hours per month | Number of extra hours per month | Regular period of work per week | Number of regular hours per month | Number of extra hours per month | Regular period of work per week |
|                                        | (1)                               | (2)                             | (3)                             | (4)                               | (5)                             | (6)                             |
| Female founders                        | -0.002 *                          | -0.167 *                        | -0.001 +                        | -0.296 *                          | -2.868                          | -0.046 +                        |
|                                        | (0.001)                           | (0.067)                         | (0.001)                         | (0.130)                           | (1.510)                         | (0.025)                         |
| All controls as in Table 2             | Yes                               | Yes                             | Yes                             | Yes                               | Yes                             | Yes                             |
| Observations                           | 78,177                            | 1,562                           | 78,177                          | 78,177                            | 1,562                           | 78,177                          |
| Pseudo R2 (count models) Adj. R2 (OLS) | 0.001                             | 0.063                           | 0.002                           | 0.082                             | 0.396                           | 0.100                           |

+ p < 0.10; \* p < 0.05. Values in parentheses are standard errors clustered at the firm-level.

**Table 10A.** Pre-Test Results for Male and Female Names (Study 2, Experimental Data)

|         | Black | Male | SES  | Respondents |
|---------|-------|------|------|-------------|
| Joe     | 0.00  | 1.00 | 1.87 | 44          |
| Matthew | 0.07  | 0.98 | 1.98 | 44          |
| Chloe   | 0.07  | 0.00 | 1.89 | 45          |
| Amanda  | 0.05  | 0.00 | 1.91 | 42          |

**Table 11A.** Respondent Characteristics by Treatment: Balance Table (Study 3, Experimental Data)

|                    | Control<br>(Male Founder: N=493) |       | Treatment<br>(Female Founder: N=489) |       | Diff   | p-value |
|--------------------|----------------------------------|-------|--------------------------------------|-------|--------|---------|
|                    | Mean                             | SD    | Mean                                 | SD    |        |         |
| Male Respondent    | 0.434                            | 0.496 | 0.483                                | 0.500 | -0.079 | 0.013   |
| White              | 0.803                            | 0.398 | 0.818                                | 0.386 | -0.015 | 0.556   |
| Education          | 3.738                            | 1.234 | 3.869                                | 1.275 | -0.131 | 0.103   |
| Worked for Startup | 0.150                            | 0.358 | 0.147                                | 0.355 | 0.003  | 0.900   |
| Age                | 2.730                            | 1.292 | 2.646                                | 1.131 | 0.084  | 0.279   |

**Table 12A.** Average Causal Mediation Effect (Study 3, Experimental Data) – based on models reported in Table 6

|                                                                                         | Mean   | 95% Conf. Interval | Sensitivity |
|-----------------------------------------------------------------------------------------|--------|--------------------|-------------|
| <b>a) Model 3 (Likelihood of Extra Work mediated by “Request in Unfair”)</b>            |        |                    |             |
| ACME                                                                                    | -0.015 | -0.031             | -0.000      |
| Direct Effect                                                                           | -0.046 | -0.100             | 0.009       |
| Total Effect                                                                            | -0.061 | -0.116             | -0.003      |
| % of Tot Eff mediated                                                                   | 0.235  | 0.111              | 1.447       |
| Rho at which ACME=0                                                                     |        |                    | -0.251      |
| <b>b) Model 4 (Extra Work Volume mediated by “Request in Unfair”)</b>                   |        |                    |             |
| ACME                                                                                    | -0.064 | -0.135             | -0.002      |
| Direct Effect                                                                           | -0.186 | -0.415             | 0.052       |
| Total Effect                                                                            | -0.250 | -0.485             | -0.006      |
| % of Tot Eff mediated                                                                   | 0.252  | 0.112              | 1.792       |
| Rho at which ACME=0                                                                     |        |                    | -0.260      |
| <b>c) Model 6 (Likelihood of Extra Work mediated by “Work is Harder than Expected”)</b> |        |                    |             |
| ACME                                                                                    | -0.007 | -0.016             | -0.000      |
| Direct Effect                                                                           | -0.054 | -0.109             | 0.004       |
| Total Effect                                                                            | -0.061 | -0.114             | -0.004      |
| % of Tot Eff mediated                                                                   | 0.112  | 0.054              | 0.758       |
| Rho at which ACME=0                                                                     |        |                    | -0.067      |
| <b>d) Model 7 (Extra Work Volume mediated by “Work is Harder than Expected”)</b>        |        |                    |             |
| ACME                                                                                    | -0.027 | -0.065             | 0.001       |
| Direct Effect                                                                           | -0.223 | -0.462             | 0.023       |
| Total Effect                                                                            | -0.250 | -0.479             | -0.006      |
| % of Tot Eff mediated                                                                   | 0.107  | 0.047              | 0.759       |
| Rho at which ACME=0                                                                     |        |                    | -0.059      |

**Table 13A.** Additional tests for general gender bias (Study 2, Experimental Data)

|                                                               | Work Errors        |                     |                     |                     | Work Time           |                     |                     |                      |
|---------------------------------------------------------------|--------------------|---------------------|---------------------|---------------------|---------------------|---------------------|---------------------|----------------------|
|                                                               | (1)                | (2)                 | (3)                 | (4)                 | (5)                 | (6)                 | (7)                 | (8)                  |
| <b><u>Treatments</u></b>                                      |                    |                     |                     |                     |                     |                     |                     |                      |
| Male Founders                                                 | 0.011<br>(0.035)   |                     | 0.028<br>(0.039)    |                     | 3.246***<br>(0.589) |                     | 4.062***<br>(0.607) |                      |
| Female Founders                                               | 0.042<br>(0.034)   | 0.031<br>(0.030)    | 0.036<br>(0.0373)   | 0.007<br>(0.037)    | 2.161***<br>(0.583) | -1.085*<br>(0.536)  | 2.100***<br>(0.583) | -1.942**<br>(0.633)  |
| <b><u>Control Variables: Respondent's Characteristics</u></b> |                    |                     |                     |                     |                     |                     |                     |                      |
| Male                                                          |                    |                     | 0.105***<br>(0.031) | 0.159***<br>(0.038) |                     |                     | -1.338**<br>(0.487) | -1.574 **<br>(0.639) |
| Education                                                     |                    |                     | -0.023<br>(0.017)   | -0.046<br>(0.019)   |                     |                     | 0.539*<br>(0.266)   | 0.426<br>(0.337)     |
| White                                                         |                    |                     | 0.053<br>(0.038)    | 0.055<br>(0.045)    |                     |                     | -1.581**<br>(0.587) | -2.032**<br>(0.767)  |
| Worked for Startup                                            |                    |                     | 0.168***<br>(0.042) | 0.187***<br>(0.048) |                     |                     | 0.642<br>(0.692)    | 0.057<br>(0.864)     |
| Age                                                           |                    |                     | -0.011<br>(0.007)   | -0.012+<br>(0.008)  |                     |                     | 0.101<br>(0.091)    | 0.063<br>(0.102)     |
| Constant                                                      | 2.533***<br>(0.03) | 2.575***<br>(0.020) | 2.524***<br>(0.080) | 2.611***<br>(0.092) | 6.160***<br>(0.463) | 8.319***<br>(0.373) | 5.870***<br>(1.256) | 9.041***<br>(1.573)  |
| Specification                                                 | Poisson            | Poisson             | Poisson             | Poisson             | OLS                 | OLS                 | OLS                 | OLS                  |
| Observations                                                  | 457                | 353                 | 333                 | 229                 | 457                 | 353                 | 333                 | 229                  |
| $R^2$                                                         |                    |                     |                     |                     | 0.063               | 0.012               | 0.182               | 0.105                |
| Pseudo $R^2$                                                  | 0.001              | 0.000               | 0.015               | 0.024               |                     |                     |                     |                      |

Standard errors in parentheses; +  $p < 0.1$ , \*  $p < 0.05$ , \*\*  $p < 0.01$ , \*\*\*  $p < 0.001$ ; two-tailed tests

**Fig. 1A. Likelihood of Extra Work**

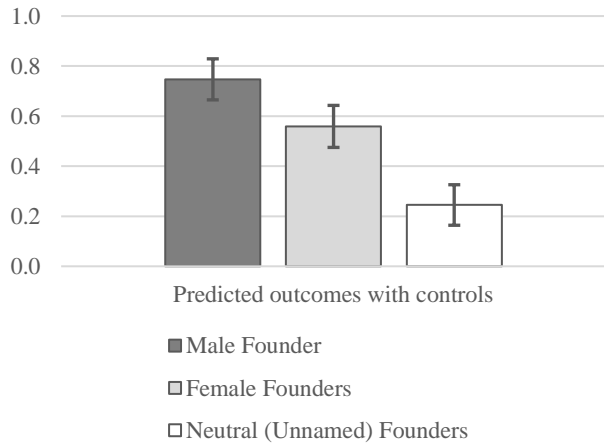

**Fig. 1B. Likelihood of Extra Work (no controls)**

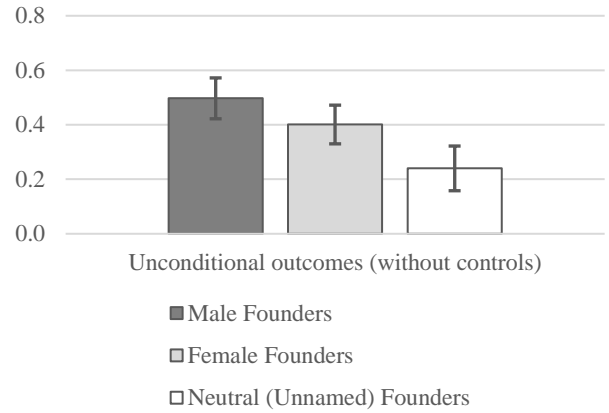

**Fig. 2A. Extra Work Volume**

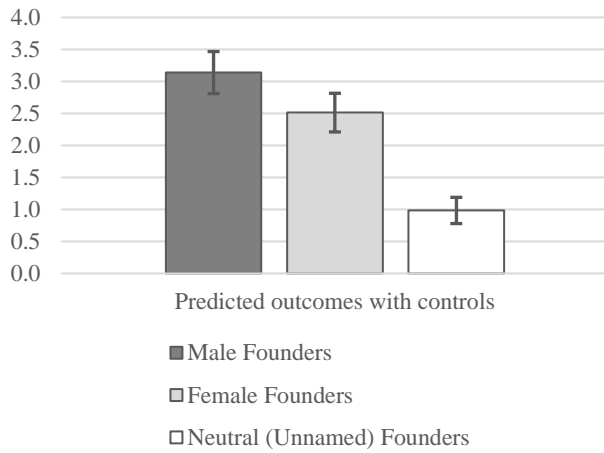

**Fig. 2B. Extra Work Volume (no controls)**

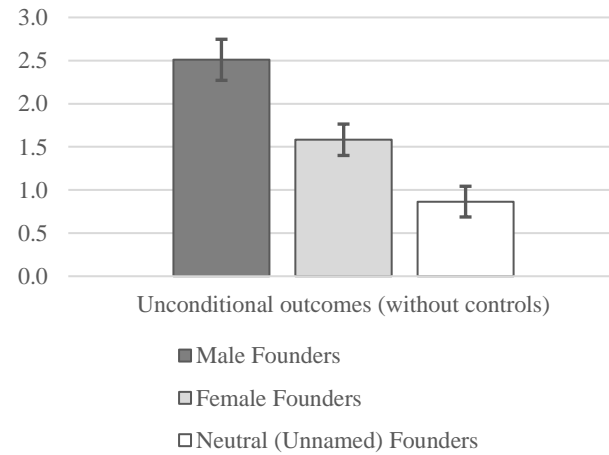

**Fig. 3A. Work Errors**

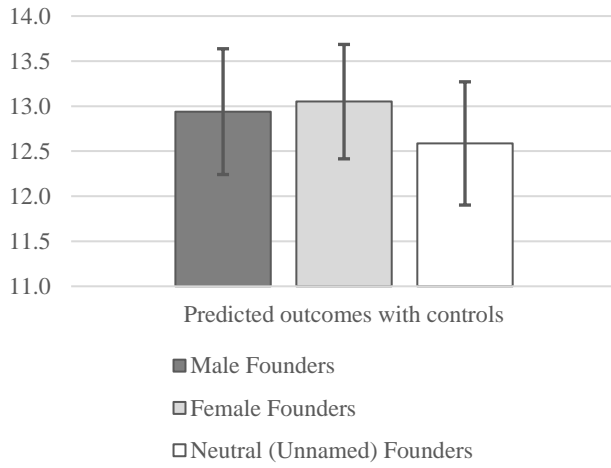

**Fig. 3B. Work Errors (no controls)**

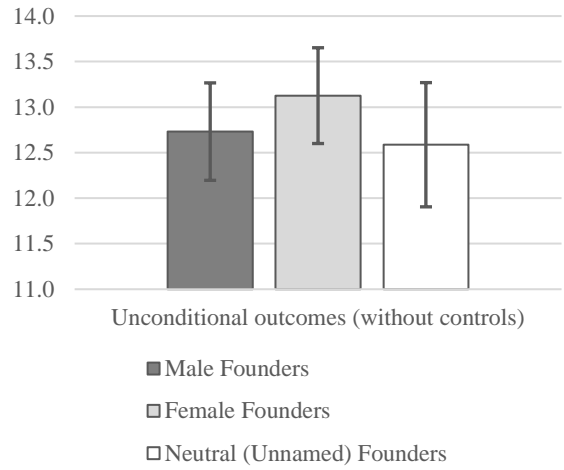

**Fig. 4A. Work Time**

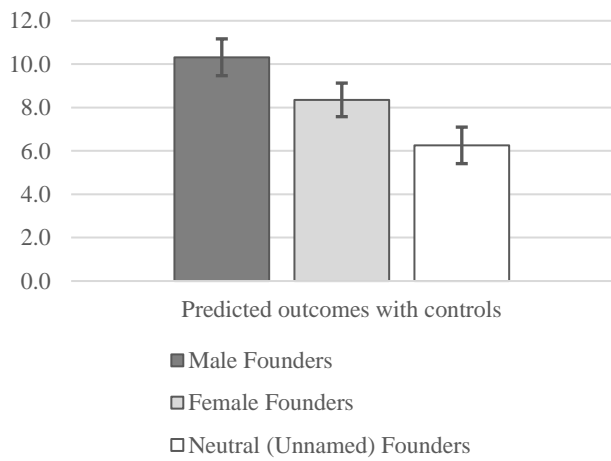

**Fig 4B. Work Time (no controls)**

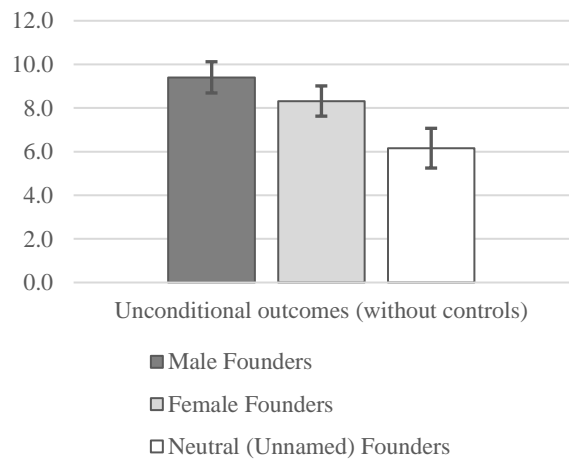

## **Appendix B:**

### **Study 2, First Experiment**

#### **Questions (in order)**

1. We try to make sure that we pay people fairly for their work. How did we do? (5 pt)
2. Were our instructions clear? (5pt)
3. How interesting was the HIT? (5pt)
4. How difficult was the HIT? (5pt)
5. This is all the work we can presently pay you for . . .

#### **Manipulation & Attention**

6. Do you remember the name of our company?
7. Do you remember the name of the founders?
8. Do you have a more favorable impression of: (female founders, male founders, no opinion)
9. Why?

#### **Mechanisms (7 pt Likert)**

10. Some firms are close to the local community while others are more detached. What is your impression of this company?
11. In some firms, the goal is just to maximize profits. In other firms, they care more about upholding community-focused business practices than profitability. What is your impression of this company?
12. In some firms, the goal is just to maximize profits. In other firms, they care more about care for customers than profitability. What is your impression of this company?
13. In some firms, the goal is just to maximize profits. In other firms, they care more about care for employees than profitability. What is your impression of this company?
14. Some firms achieve success easily. Other firms, achieve success against all odds. What is your impression of this company?
15. Some firms experience difficulties because of the environment. Other firms, experience difficulties because of their own mistakes. What is your impression of this company?
16. What is the probability that this company will enjoy success in the future?
17. How well will this company respond to adversity or difficult conditions in its industry?

#### **Demographics**

18. Age
19. Gender
20. Education
21. Ethnicity
22. Have you ever worked in a startup before?
23. Occupation
24. How many employees in your establishment?
25. If you had any problems please report them here.

## **Appendix C:**

### **Study 3, Second Experiment**

#### **Questions (in order)**

1. This is all the work we can presently pay you for . . .
2. What percent of tech startups like ours do you think earn money in their first year?
3. What do you think is the average lifespan for a startup like ours (in years)?
4. For future reference, what do you think is the right reward for this HIT?
5. We're relatively new to mTurk, was it fair of us to ask if you could do extra work? (Yes/No)
6. Was the HIT harder or easier than you expected? (5pt)

#### **Manipulation & Attention**

7. Do you remember the name of our company?
8. Do you remember the name of the founders?

#### **Demographics**

9. Age
10. Gender
11. Education
12. Ethnicity
13. Have you ever worked in a startup before?
14. Occupation
15. How many employees in your establishment?
16. If you had any problems please report them here:
